# Supplementary material
Source: PubMed Central journal article supplement (PMC2849653)
Supplement: NIHMS137290-supplement-01.pdf [file NIHMS137290-supplement-01.pdf]

# Supplementary Figure 1

## A

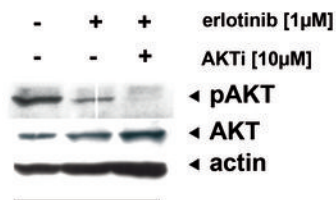

H1650

## B

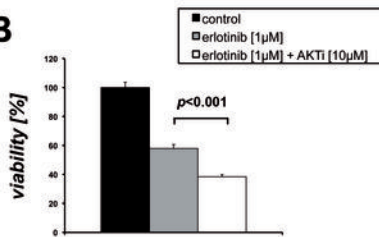

H1650

| Supplemental Table 1: Cell line overview |          |                      |                                     |               |                   |                                 |
|------------------------------------------|----------|----------------------|-------------------------------------|---------------|-------------------|---------------------------------|
| Sample Name                              | Provider | ATCC/DSMZ-<br>Number | Histology                           | EGFR mutation | Met amplification | IC <sub>50</sub> erlotinib [μM] |
| A549                                     | ATCC     | CCL-185              | Carcinoma, not specified            | 0             | 0                 | 10                              |
| Calu1                                    | ATCC     | HTB-54               | Epidermoid carcinoma                | 0             | 0                 | 10                              |
| Calu3                                    | ATCC     | HTB-55               | Adenocarcinoma                      | 0             | 0                 | 0.7                             |
| Calu6                                    | ATCC     | HTB-56               | Anaplastic carcinoma                | 0             | 0                 | 9.65                            |
| H1299                                    | ATCC     | CRL-5803             | Carcinoma, not specified            | 0             | 0                 | 10                              |
| H1355                                    | ATCC     | CRL-5865             | Adenocarcinoma                      | 0             | 0                 | 3.31                            |
| H1395                                    | ATCC     | CRL-5868             | Adenocarcinoma                      | 0             | 0                 | 5.05                            |
| H1437                                    | ATCC     | CRL-5872             | Adenocarcinoma                      | 0             | 0                 | 10                              |
| H157                                     |          |                      | Squamous cell carcinoma             | 0             | 0                 | 10                              |
| H1648                                    | ATCC     | CRL-5882             | Adenocarcinoma                      | 0             | 1                 | 7.77                            |
| H1650                                    | ATCC     | CRL-5883             | Adenocarcinoma, Bronchoalveolar ca. | 1             | 0                 | 2.13                            |
| H1666                                    | ATCC     | CRL-5885             | Adenocarcinoma, Bronchoalveolar ca. | 0             | 0                 | 3.31                            |
| H1770                                    | ATCC     | CRL-5893             | Neuroendocrine carcinoma            | 0             | 0                 | 10                              |
| H1792                                    | ATCC     | CRL-5895             | Adenocarcinoma                      | 0             | 0                 | 10                              |
| H1819                                    | ATCC     | CRL-5897             | Adenocarcinoma                      | 0             | 0                 | 3.92                            |
| H1975                                    | ATCC     | CRL-5908             | Adenocarcinoma                      | 1             | 0                 | 10                              |
| H1993                                    | ATCC     | CRL-5909             | Adenocarcinoma                      | 0             | 1                 | 8.06                            |
| H2009                                    | ATCC     | CRL-5911             | Adenocarcinoma                      | 0             | 0                 | 10                              |
| H2052                                    | ATCC     | CRL-5915             | Mesothelioma                        | 0             | 0                 | 8.98                            |
| H2087                                    | ATCC     | CRL-5922             | Adenocarcinoma                      | 0             | 0                 | 10                              |
| H2122                                    | ATCC     | CRL-5985             | Adenocarcinoma                      | 0             | 0                 | 10                              |
| H2126                                    | ATCC     | CCL-256              | Adenocarcinoma                      | 0             | 0                 | 10                              |
| H23                                      | ATCC     | CRL-5800             | Adenocarcinoma                      | 0             | 0                 | 10                              |
| H2347                                    | ATCC     | CRL-5942             | Adenocarcinoma                      | 0             | 0                 | 10                              |
| H28                                      | ATCC     | CRL-5820             | Mesothelioma                        | 0             | 0                 | 10                              |
| H2882                                    |          |                      | Squamous cell carcinoma             | 0             | 0                 | 10                              |
| H2887                                    |          |                      | Adenocarcinoma                      | 0             | 0                 | 10                              |
| H3122                                    |          |                      | Adenocarcinoma                      | 0             | 0                 | 10                              |
| H322                                     |          |                      | Adenocarcinoma                      | 0             | 0                 | 2.21                            |
| H3255                                    |          |                      | Adenocarcinoma                      | 1             | 0                 | 0.02                            |
| H358                                     | ATCC     | CRL-5807             | Bronchioalveolar carcinoma          | 0             | 0                 | 1.11                            |
| H441                                     | ATCC     | HTB-174              | Papillary Adenocarcinoma            | 0             | 0                 | 3.61                            |
| H460                                     | ATCC     | HTB-177              | Large cell lung cancer              | 0             | 0                 | 10                              |
| H661                                     | ATCC     | HTB-183              | Large cell lung cancer              | 0             | 0                 | 10                              |
| H820                                     | ATCC     | HTB-181              | Papillary Adenocarcinoma            | 1             | 0                 | 10                              |
| HCC1171                                  |          |                      | Adenocarcinoma                      | 0             | 0                 | 10                              |
| HCC1195                                  |          |                      | Adenosquamous carcinoma             | 0             | 0                 | 10                              |
| HCC1359                                  |          |                      | Spindle-giant cell                  | 0             | 0                 | 10                              |
| HCC15                                    | DSMZ     | ACC 496              | Squamous cell carcinoma             | 0             | 0                 | 10                              |
| HCC1833                                  |          |                      | Adenocarcinoma                      | 0             | 0                 | 10                              |
| HCC193                                   |          |                      | Adenocarcinoma                      | 0             | 0                 | 10                              |
| HCC2279                                  |          |                      | Adenosquamous carcinoma             | 1             | 0                 | 0.01                            |
| HCC2429                                  |          |                      |                                     | 0             | 0                 | 10                              |
| HCC2450                                  |          |                      | Adenocarcinoma                      | 0             | 0                 | 10                              |
| HCC2935                                  | ATCC     | CRL-2869             | Adenocarcinoma                      | 1             | 0                 | 0.07                            |
| HCC366                                   | DSMZ     | ACC 492              | Adenosquamous carcinoma             | 0             | 0                 | 0.99                            |
| HCC4006                                  | ATCC     | CRL-2871             | Adenocarcinoma                      | 1             | 0                 | 0.04                            |
| HCC44                                    | DSMZ     | ACC 534              | Adenocarcinoma                      | 0             | 0                 | 10                              |
| HCC461                                   |          |                      | Adenocarcinoma                      | 0             | 0                 | 9.04                            |
| HCC515                                   |          |                      |                                     | 0             | 0                 | 1.85                            |
| HCC78                                    | DSMZ     | ACC 563              | Adenocarcinoma                      | 0             | 0                 | 10                              |
| HCC827                                   | ATCC     | CRL-2868             | Adenocarcinoma                      | 1             | 0                 | 0.02                            |
| HCC95                                    |          |                      | Squamous cell carcinoma             | 0             | 0                 | 10                              |

"0" absence of mutation; "1" presence of mutation
